# Supplementary material
Source: PubMed Central journal article supplement (PMC6552415)
Supplement: supp_RA118.006423_141540_2_supp_307549_pp2m4m.pdf [file supp_RA118.006423_141540_2_supp_307549_pp2m4m.pdf]

|                                | SHAM  |       |       |             |             | ABHF  |       |       |              |             |
|--------------------------------|-------|-------|-------|-------------|-------------|-------|-------|-------|--------------|-------------|
|                                | RAT 1 | RAT 2 | RAT 3 | AVG         | SEM         | RAT 4 | RAT 5 | RAT 6 | AVG          | SEM         |
| Body weight (g)                | 447   | 374   | 343   | <b>388</b>  | <b>30,8</b> | 359   | 462   | 297   | <b>372,7</b> | <b>48,1</b> |
| Heart weight (g)               | 1,41  | 0,96  | 0,85  | <b>1,1</b>  | <b>0,2</b>  | 1,93  | 2,28  | 2,61  | <b>2,3</b>   | <b>0,2</b>  |
| RV weight (g)                  | 0,13  | 0,18  | 0,16  | <b>0,2</b>  | <b>0,0</b>  | 0,17  | 0,26  | 0,22  | <b>0,2</b>   | <b>0,0</b>  |
| LV weight (g)                  | 0,85  | 0,60  | 0,95  | <b>0,8</b>  | <b>0,1</b>  | 1,13  | 1,35  | 1,22  | <b>1,2</b>   | <b>0,1</b>  |
| Lung weight (g)                | 1,62  | 1,02  | 1,25  | <b>1,3</b>  | <b>0,2</b>  | 2,05  | 3,51  | 5,21  | <b>3,6</b>   | <b>0,9</b>  |
| PWd (mm)                       | 1,71  | 1,50  | 1,39  | <b>1,5</b>  | <b>0,1</b>  | 2,35  | 2,53  | 2,35  | <b>2,4</b>   | <b>0,1</b>  |
| IVSd (mm)                      | 1,55  | 1,65  | 1,23  | <b>1,5</b>  | <b>0,1</b>  | 2,08  | 2,69  | 2,67  | <b>2,5</b>   | <b>0,2</b>  |
| LVDd (mm)                      | 6,73  | 6,45  | 6,41  | <b>6,5</b>  | <b>0,1</b>  | 7,47  | 5,77  | 7,37  | <b>6,9</b>   | <b>0,6</b>  |
| LVDs (mm)                      | 3,04  | 3,50  | 3,36  | <b>3,3</b>  | <b>0,1</b>  | 4,54  | 3,28  | 5,34  | <b>4,4</b>   | <b>0,6</b>  |
| FS (%)                         | 54,76 | 45,74 | 47,51 | <b>49,3</b> | <b>2,8</b>  | 39,29 | 43,14 | 27,53 | <b>36,7</b>  | <b>4,7</b>  |
| LAD (mm)                       | 3,04  | 3,08  | 2,99  | <b>3,0</b>  | <b>0,0</b>  | 5,12  | 5,93  | 5,82  | <b>5,6</b>   | <b>0,3</b>  |
| Aorta (mm)                     | 2,03  | 2,24  | 2,14  | <b>2,1</b>  | <b>0,1</b>  | 2,46  | 2,37  | 2,08  | <b>2,3</b>   | <b>0,1</b>  |
| Peak mitral flow<br>(m s-1)    | 1225  | 1079  | 821   | <b>1042</b> | <b>118</b>  | 982   | 1006  | 1375  | <b>1121</b>  | <b>127</b>  |
| Mitral deceleration<br>(m s-1) | 2641  | 2472  | 1669  | <b>2261</b> | <b>300</b>  | 3858  | 4349  | 8737  | <b>5648</b>  | <b>1551</b> |

**Supporting Table S4.** Description of SHAM (control animals) and aortic banded rats with heart failure (ABHF) used in the large scale AP-MS experiments. The following abbreviations are used: RV, right ventricle; LV, left ventricle; PWd, posterior wall thickness in diastole; IVSd, interventricular septum in diastole; LVDd/s, left ventricular diameter in diastole or systole; FS, fractional shortening; LAD, left atrial diameter.
